# Supplementary material for: Improvement of Piglet Rearing’s Energy Efficiency and Sustainability Using Air-to-Air Heat Exchangers—A Two-Year Case Study
Source: MDPI journal article supplement (doi:10.3390/en16041799), 2023-02-11
Supplement: s1 [file s1]

Archive with 1 entries (1 files):
- energies-2208303_Supplementary Material_final_clean.pdf
